# Supplementary material for: Therapeutic potential of fucoidan in the reduction of hepatic pathology in murine schistosomiasis japonica
Source: PubMed Central journal article supplement (PMC7487607; doi:10.1186/s13071-020-04332-7), 2020-09-07
Supplement: 13071_2020_4332_MOESM1_ESM.pdf [file 13071_2020_4332_MOESM1_ESM.pdf]

**Additional file 1: Table S1.** The primer sequences used in detecting the levels of mRNA.

| <b>Gene name</b>               | <b>Gene ID</b> | <b>Forward (5'-3')</b>    | <b>Reverse (5'-3')</b>    |
|--------------------------------|----------------|---------------------------|---------------------------|
| <i>IL-4</i>                    | 16189          | ATGGGTCTCACCTCCCAACTG     | TCAGCTCGAACACTTTGAATAT    |
| <i>IL-6</i>                    | 16193          | GAGGATACCACTCCCAACAGACC   | AAGTGCATCATCGTTGTTTCATACA |
| <i>IL-10</i>                   | 16153          | ACTTTAAGGGTTACTTGGGTTGC   | ATTTTCACAGGGGAGAAATCG     |
| <i>IL-12p35</i>                | 16159          | GACAGTGGAGGCACCAGGCC      | CAGACATCGCTGTCCCGGCG      |
| <i>IL-13</i>                   | 16163          | GCCAGCCCACAGTTCTAC        | GAGATGTTGGTCAGGGAAT       |
| <i>TGF-<math>\beta</math></i>  | 21803          | ATGCTAAAGAGGTCAAAGC       | CCAAGGTAACGCCAGGAATT      |
| <i>TNF-<math>\alpha</math></i> | 21926          | CATCTTCTCAAAATTCGAGTGACAA | TGGGAGTAGACAAGGTACAACCC   |
| <i>GAPDH</i>                   | 14433          | GGTGAAGGTCGGTGTGAACG      | ACCATGTAGTTGAGGTCAATGAAGG |
