# Supplementary material for: Therapeutic potential of fucoidan in the reduction of hepatic pathology in murine schistosomiasis japonica
Source: PubMed Central journal article supplement (PMC7487607; doi:10.1186/s13071-020-04332-7), 2020-09-07
Supplement: 13071_2020_4332_MOESM2_ESM.pdf [file 13071_2020_4332_MOESM2_ESM.pdf]

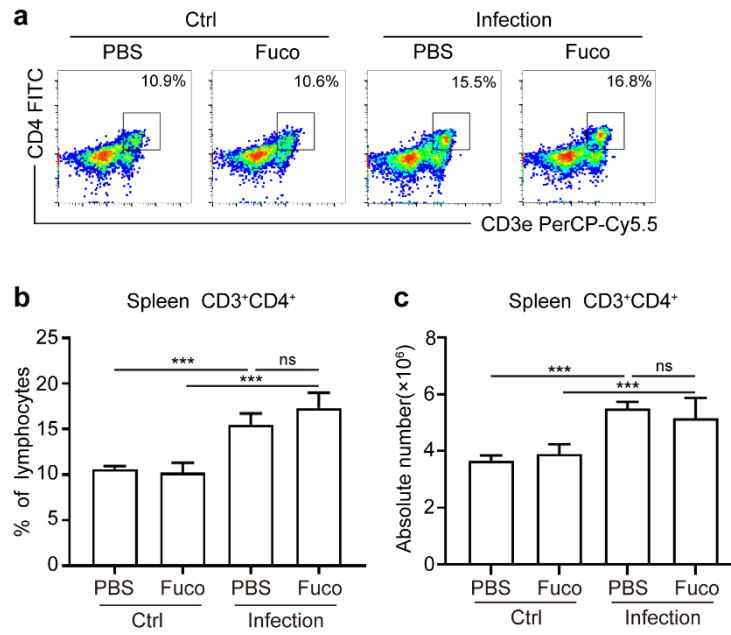

**Additional file 2: Figure S1.** Flow cytometry of total CD3<sup>+</sup>CD4<sup>+</sup> T cells in spleens.

(a) Representative FACS gates from splenocytes are presented. (b,c) The percentage and the absolute number of CD3<sup>+</sup>CD4<sup>+</sup> cells from splenocytes of each group were analyzed by flow cytometry. Data are expressed as the mean ± SD for each group, and all experiments were performed twice with similar results. \* $P < 0.05$ , \*\* $P < 0.01$ , \*\*\* $P < 0.001$  (ANOVA/LSD).
