# Supplementary material for: Therapeutic potential of fucoidan in the reduction of hepatic pathology in murine schistosomiasis japonica
Source: PubMed Central journal article supplement (PMC7487607; doi:10.1186/s13071-020-04332-7), 2020-09-07
Supplement: 13071_2020_4332_MOESM3_ESM.pdf [file 13071_2020_4332_MOESM3_ESM.pdf]

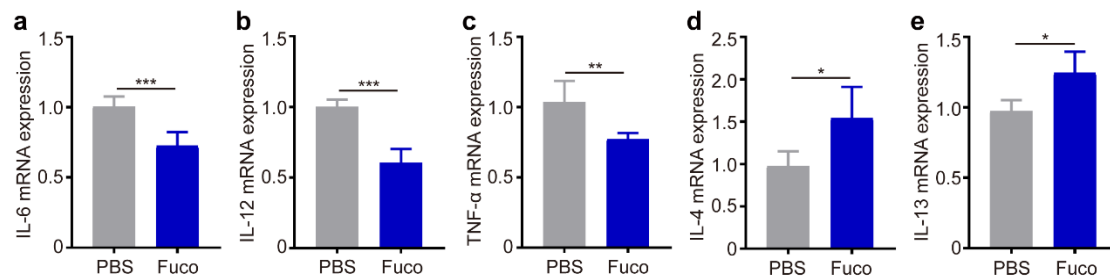

**Additional file 3: Figure S2.** The mRNA expression of cytokines in fucoidan-treated macrophages. The expression of inflammatory cytokines IL-6 (a), IL-12 (b), TNF- $\alpha$  (c), IL-4 (d) and IL-13 (e) were evaluated by RT-PCR. The expression level of each gene was standardized to the GAPDH mRNA levels in macrophages treated with PBS. Results are presented using the  $2^{-\Delta\Delta C_t}$  method. Data are expressed as the mean  $\pm$  SD for each group, and all experiments were performed twice with similar results. \* $P < 0.05$ , \*\* $P < 0.01$ , \*\*\* $P < 0.001$  (Student's t-test).
